# Supplementary material for: Protective Effects of Hydroxyphenyl Propionic Acids on Lipid Metabolism and Gut Microbiota in Mice Fed a High-Fat Diet
Source: MDPI journal article supplement (doi:10.3390/nu15041043), 2023-02-20

Supplemental Figure legends  
Supplementary Figure S1. The relative abundance of microbiota in ND, HFD, 3-HPP and 4-HPP groups.  
(A) phylum level; (B) genus level.

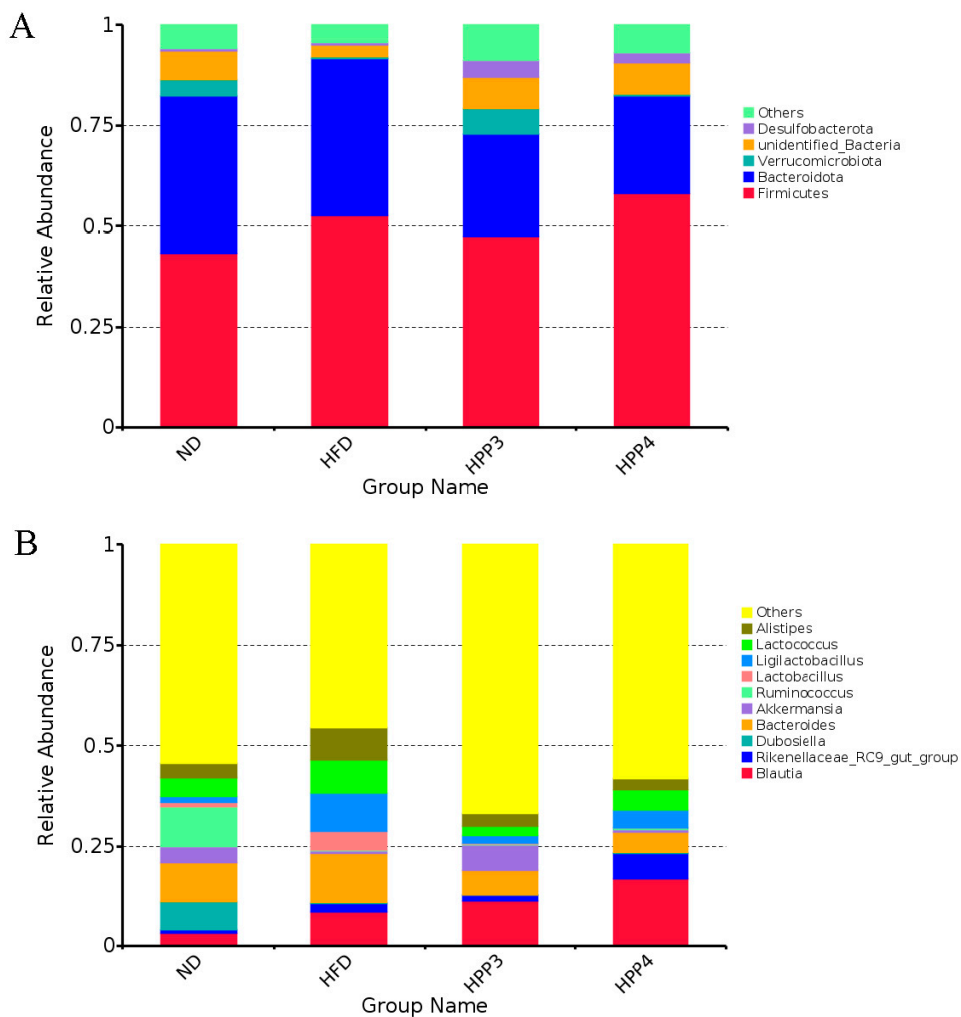

Supplementary Figure S2. A comparison between the ND and HFD groups of the predicated metabolic profiles of gut microbiota.

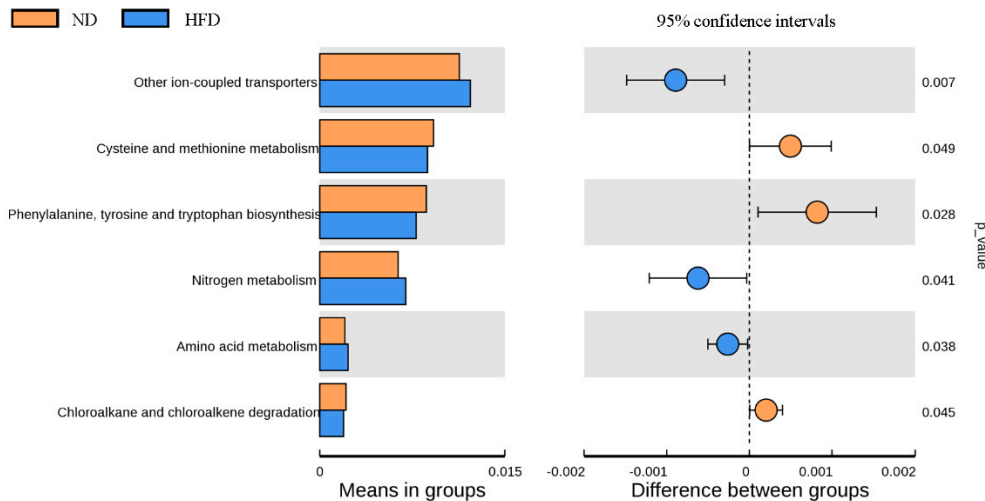

Supplement: s1 [file s1]
